# Supplementary material
Source: PubMed Central journal article supplement (PMC9382750)
Supplement: 13045_2022_1329_MOESM1_ESM.pdf [file 13045_2022_1329_MOESM1_ESM.pdf]

## ADDITIONAL FILE

### Evidence of SARS-CoV-2 Spike protein on retrieved thrombi from COVID-19 patients

Manuela De Michele (MD, PhD, MSc)<sup>1</sup>, Giulia d'Amati (MD, PhD)<sup>2</sup>, Martina Leopizzi (MD, PhD)<sup>3</sup>, Marta Iacobucci (MD)<sup>4</sup>, Irene Berto (MD)<sup>1</sup>, Svetlana Lorenzano (MD, PhD, MSc)<sup>5</sup>, Laura Mazzuti (MD, PhD)<sup>6</sup>, Ombretta Turriziani (MD, PhD)<sup>7</sup>, Oscar G. Schiavo (MD)<sup>1</sup>, Danilo Toni (MD, PhD)<sup>5</sup>

<sup>1</sup>Emergency Department, Stroke Unit, Sapienza University of Rome, Rome, Italy

<sup>2</sup>Department of Radiology, Oncology and Pathological Science, Sapienza University of Rome, Rome, Italy

<sup>3</sup>Department of Medico-surgical sciences and Biotechnologies, Sapienza University of Rome, Latin, Italy

<sup>4</sup>Neuroradiology Unit, Department of Human Neurosciences, Sapienza University of Rome, Rome, Italy

<sup>5</sup>Department of Human Neurosciences, Sapienza University of Rome, Rome, Italy

<sup>6</sup>Department of Clinical and Molecular Medicine,  ienza University, Sant'Andrea Hospital

<sup>7</sup>Department of Molecular Medicine,  Sapienza University

**Running heads:** SARS-CoV-2 Spike protein in COVID-19 clots

#### Corresponding Author:

Manuela De Michele

Sapienza University of Rome - Emergency Department, Stroke Unit

Viale del Policlinico, 155 - 00161

Rome, Italy

Phone numbers: +39/0649979595; +39/0649979529

Email: m.demichele@policlinicoumberto1.it

**Supplementary Table. Demographics and other clinical characteristics of the study patients**

|                                                            | <b>LVO AIS patients with COVID-19</b><br>n=3 | <b>LVO AIS patients without COVID-19</b><br>n=4 | <b>AMI patient</b><br>n=1 |
|------------------------------------------------------------|----------------------------------------------|-------------------------------------------------|---------------------------|
| <b><i>Demographics</i></b>                                 |                                              |                                                 |                           |
| Age, yrs (n. of pts with available data)                   | (3/3)                                        | (4/4)                                           | 43                        |
| - mean                                                     | 67                                           | 69.8                                            |                           |
| Sex, male                                                  | 2/3                                          | 3/4                                             | 1                         |
| <b><i>Vascular risk factors and comorbidities</i></b>      |                                              |                                                 |                           |
| Smoking                                                    | 0                                            | 0                                               | -                         |
| Hypertension                                               | 1/3                                          | 1/4                                             | -                         |
| Diabetes mellitus                                          | 1/3                                          | 0                                               | -                         |
| Atrial fibrillation                                        | 2/3                                          | 1/4                                             | -                         |
| Dyslipidemia                                               | 1/3                                          | 1/4                                             | -                         |
| Ischemic cardiopathy                                       | 0                                            | 0                                               | -                         |
| Previous stroke/TIA                                        | 1/3                                          | 0                                               | -                         |
| Anemia                                                     | 1/3                                          | 0                                               | -                         |
| Hypothyroidism                                             | 0                                            | 0                                               | -                         |
| Carotid artery stenosis >50%                               | 0                                            | 2/4                                             | -                         |
| Valvulopathy                                               | 0                                            | 0                                               | -                         |
| Neoplasm                                                   | 0                                            | 0                                               | -                         |
| <b><i>Medications prior to admission</i></b>               |                                              |                                                 |                           |
| Antiplatelets                                              | 1/3                                          | 2/4                                             | -                         |
| Anticoagulants                                             | 0                                            | 0                                               | -                         |
| Beta-blockers                                              | 1/3                                          | 0                                               | -                         |
| ACE-I/ACEIIR-I                                             | 1/3                                          | 2/4                                             | -                         |
| Diuretics                                                  | 0                                            | 1/4                                             | -                         |
| Calcium antagonists                                        | 0                                            | 0                                               | -                         |
| Lipid lowering medications                                 | 0                                            | 0                                               | -                         |
| Blood glucose lowering medications                         | 0                                            | 0                                               | -                         |
| <b><i>Admission</i></b>                                    |                                              |                                                 |                           |
| Time from diagnosis of COVID-19 to AIS or AMI onset (days) | (2/3)                                        | Not applicable                                  | 24                        |
| - mean                                                     | 0                                            |                                                 |                           |
| NIHSS at admission                                         | (3/3)                                        | (4/4)                                           | Not applicable            |
| - mean                                                     | 11.7                                         | 19.3                                            |                           |
| - median                                                   | 8.0                                          | 21.5                                            |                           |
| NIHSS at 24 h                                              | (3/3)                                        | (4/4)                                           | Not applicable            |
| - mean                                                     | 8.0                                          | 13.5                                            |                           |
| - median                                                   | 8.0                                          | 12.5                                            |                           |
| Artery occlusion                                           | 3/3                                          | 4/4                                             |                           |
| - MCA-M1                                                   | 2                                            | 3                                               | 0                         |
| - MCA-M2                                                   | 1                                            | 0                                               | 0                         |
| - ICA-MCA, tandem occlusion                                | 0                                            | 1                                               | 0                         |
| - Coronary artery                                          | 0                                            | 0                                               | 1                         |
| IV rt-PA                                                   | 1/3                                          | 3/4                                             | -                         |
| Endovascular treatment                                     | 3/3                                          | 3/4                                             | 1                         |
| Stroke volume, cm <sup>3</sup>                             | 3/3                                          | 4/4                                             | Not applicable            |
| - mean                                                     | 20.93                                        | 20.05                                           |                           |
| - median                                                   | 8.30                                         | 18.00                                           |                           |
| Pneumonia                                                  | 2/3                                          | 0                                               | 1                         |

Abbreviations: ACE-I/ACEIR-I, Angiotensin Converting Enzyme Inhibitors/Angiotensin Converting Enzyme-II Receptor Inhibitors; AIS, acute ischemic stroke; AMI, acute myocardial infarction; ICA, internal carotid artery; IV, intravenous; MCA, middle cerebral artery; NIHSS, National Institutes of Health Stroke Scale; rt-PA, recombinant tissue plasminogen activator; TIA, transient ischemic attack.

**Supplementary Figure.**

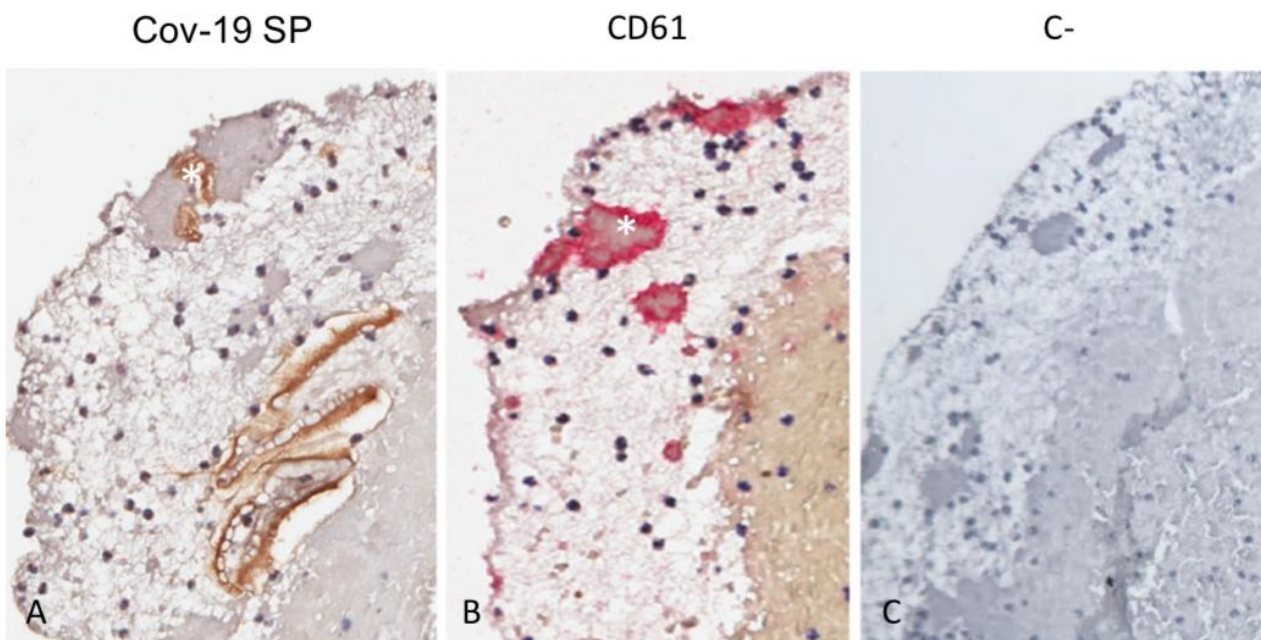

Representative images of serial sections of the clot from the COVID-19 patient with acute myocardial infarction, stained for SP (in brown - A) and CD61 for platelets identification (in red - B). There is a substantial overlap between the patchy areas of CD61 staining and SP protein (white asterisks). C- represents the negative control (omitting the primary antibody).

Abbreviation: Cov-19 SP: SARS-CoV-2 spike protein
